1 **Sex-linked markers in an Australian frog *Platyplectrum ornatum* with a small genome**  
2 **and homomorphic sex chromosomes**

3 Chad Schimeck<sup>1</sup>, Foyez Shams<sup>1</sup>, Ikuo Miura<sup>2</sup>, Simon Clulow<sup>1</sup>, Zuzana Majtanova<sup>3</sup>, Janine  
4 Deakin<sup>1</sup>, Tariq Ezaz<sup>1\*</sup>

5 <sup>1</sup> Institute for Applied Ecology, Faculty of Science and Technology, University of Canberra,  
6 Bruce, ACT 2617, Australia.

7 <sup>2</sup> Amphibian Research Center, Hiroshima University, 1-3-1 Kagamiyama, Higashi-Hiroshima  
8 739-8526, Japan.

9 <sup>3</sup> Laboratory of Fish Genetics, Institute of Animal Physiology and Genetics, Czech Academy  
10 of Sciences, 277 21 Liběchov, Czech Republic

11 Corresponding Author:

12 Tariq Ezaz

13 Faculty of Science and Technology

14 Building 3, Level C, Room 30 (3C30)

15 University of Canberra | Bruce, ACT 2617

16 T +61 2 6201 2297, Email: Tariq.Ezaz@canberra.edu.au

17

18 **Abstract**

19 Amphibians have highly diverse sex-determining modes leading to a notable interest in  
20 vertebrate sex determination and sex chromosome evolution. The identification of sex-  
21 determining systems in amphibians, however, is often difficult as a vast majority consist of  
22 homomorphic sex chromosomes making them hard to distinguish. In this study, we used  
23 Diversity Array Technology sequencing (DArTseq™) to identify the sex-determining system  
24 in the ornate burrowing frog from Australia, *Platyplectrum ornatum*. We applied DArTseq™  
25 to 44 individuals, 19 males and 25 females, collected from two locations to develop sex-  
26 linked markers. Unexpectedly, these 44 individuals were classified into two distinct  
27 population clusters based on our SNP analyses, 36 individuals in cluster-1, and 8 individuals  
28 in cluster-2. We then performed sex-linkage analyses separately in each cluster. We  
29 identified 35 sex-linked markers from cluster-1, which were all associated with maleness.  
30 Therefore, *P. ornatum* cluster-1 is utilising a male heterogametic (XX/XY) sex-determining  
31 system. On the other hand, we identified 210 sex-linked markers from cluster-2, of which 89  
32 were male specific, i.e., identifying XX/XY sex determining system and 111 were female  
33 specific, i.e., identifying ZZ/ZW sex determining system, suggesting existence of either male  
34 or female heterogametic sex determining system in cluster-2. We also performed cytogenetic

35 analyses in 1 male and 1 female from cluster-1; however, we did not detect any visible  
36 differentiation between the X and Y sex chromosomes. We also mapped sex-linked markers  
37 from the two clusters against the *P. ornatum* genome and our comparative analysis indicated  
38 that the sex chromosomes in both clusters shared homologies to chromosome 10 (autosome)  
39 of *Rana temporaria* and ZWY sex chromosome of *Xenopus tropicalis*. It is plausible that the  
40 cluster-2 has a potential to be either male or female heterogamety in sex determination,  
41 requiring further investigation.

42 **Keywords:** Sex determination, Amphibia, SNPs, Sex chromosomes

## 43 INTRODUCTION

44 Vertebrate sex determination has become a fundamental area for better understanding the  
45 evolutionary advantages and disadvantages of a species. Amphibians play a crucial role in  
46 filling the knowledge gaps as they typically contain alternative sex-determination systems,  
47 even amongst geographic populations within single species (Miura, 2017; Nishioka, Hanada,  
48 Miura, & Ryuzaki, 1994; Nishioka, Miura, & Saitoh, 1993; Rodrigues, Merilä, Patrelle, &  
49 Perrin, 2014; Toups, Rodrigues, Perrin, & Kirkpatrick, 2019). The most well researched  
50 amphibian order is Anura consisting of frogs and toads (Ma & Veltsos, 2021). By

51 understanding the sex of anurans, we can better identify the evolutionary advantages of each  
52 sex-determining system not just in frogs and toads but in all vertebrates.

53           The Anura comprises over seven thousand described species, representing frog and  
54 toads, distributed in tropical and temperate regions of the world (Vitt & Caldwell, 2013).  
55 Anurans are considered a model group for studying sex chromosome evolution given the  
56 presence of diverse modes of sex determination, homomorphic and heteromorphic sex  
57 chromosomes, multiple sex chromosome systems, rapid rate of turnover and sex reversal in  
58 natural environments (Jeffries et al., 2018; Ma & Veltsos, 2021; Miura, 2017; Miura et al.,  
59 2021; Nishioka et al., 1994; Ruiz-García, Roco, & Bullejos, 2021; Xu et al., 2022). Although  
60 mode of sex determination in a large number of species is yet to be discovered, a recent study  
61 reviewed sex determination in 222 anuran species and reported that the majority with known  
62 sex determination systems are either male heterogametic (XX/XY) or female heterogametic  
63 sex chromosomes (ZZ/ZW) (Ma & Veltsos, 2021). It also reported the abundance of  
64 homomorphic sex chromosomes amongst the Anura, with no cytogenetically distinguishable  
65 characteristics such as size polymorphism or heterochromatinization. Furthermore, transitions  
66 between male (XX/XY) and female (ZZ/ZW) heterogametic sex chromosome systems have  
67 also been reported in this group (such as Japanese wrinkled frog, *Glandirana rugosa*), where

68 both XX/XY and ZZ/ZW sex chromosomes were found in different geographic populations of  
69 the same species (Miura, 2007; Nishioka et al., 1994; Ogata, Hasegawa, Ohtani, Mineyama, &  
70 Miura, 2008).

71 In vertebrates, sex determination is either governed by genetics (genetic sex  
72 determination, GSD) where so-called master sex-determining genes on sex chromosomes are  
73 responsible for maleness or femaleness, or by environmental factors (environmental sex  
74 determination, ESD) such as temperature (Bachtrog et al., 2014; Capel, 2017). Unlike reptiles,  
75 mammals, birds and fishes, all amphibians reported to date show solely genetic sex  
76 determination (Ezaz, Stiglec, Veyrunes, & Graves, 2006; Saidapur, Gramapurohit, &  
77 Shanbhag, 2001; Sarre, Ezaz, & Georges, 2011). To date, eight genes have been proposed as  
78 candidate sex-determining genes in frogs including *Amh*, *Ar*, *Cyp19a1*, *Cyp17*, *dmrt1*, *Foxl2*,  
79 *Sfl* and *Sox3* (Miura, 2017). However, among frogs, *Dm-W* is the only confirmed sex-  
80 determining gene found in the W chromosome of the African clawed frog *Xenopus laevis*,  
81 functioning primarily to determine ovary (Yoshimoto et al., 2010; Yoshimoto et al., 2008).

82 Australia is home to around 248 described frog species, which form highly diverse  
83 lineages that have adapted to and evolved across this largely arid and huge continent (Clulow  
84 & Swan, 2018). However, very little is known about sex determination in Australian frogs.

85 Prior to the current study, only two Australian frog species have been investigated to  
86 understand their sex-determining system and identify sex chromosomes involved (Mahony,  
87 1991; Sopniewski, Shams, Scheele, Kefford, & Ezaz, 2019). In our previous study Sopniewski  
88 et al. (2019), we identified sex linked markers in a threatened species *Litoria aurea* and  
89 discussed its implications for the benefit of sex-linked markers, not only in understanding  
90 evolution of sex determination, but also how these markers can assist in conservation and  
91 management of vulnerable species in establishing captive breeding programs.

92 In this study, we investigated another Australian native species, the ornate burrowing  
93 frog *Platyplectrum ornatum*, found throughout northern and eastern regions of Australia. It is  
94 of particular interest because it has one of the smallest genomes among amphibians globally  
95 (Lamichhaney et al., 2021). We applied genotyping by sequencing and cytogenetic analyses to  
96 identify sex-linked markers and sex chromosomes in this species. Our study identified two  
97 distinct population clusters within our samples, one containing a XX/XY sex chromosome  
98 system, while the other contained both XY and ZW sex chromosome systems, the first such  
99 system reported for an Australian frog. We discuss the evolutionary origins of *P. ornatum* sex  
100 chromosomes by comparative analysis of the sex-linked markers.

101

## 102 **RESULTS**

103 Sequencing using Diversity Arrays Technology (DArTseq) yielded 26,549 SNPs and 33,444  
104 PA loci in 44 individuals. The average call ratio of the SNPs loci was 0.86, and the PA loci  
105 was 0.97, indicating that all the loci were sequenced successfully in almost all individuals.  
106 The average sequencing reproducibility of the SNP loci was 0.98 and the SilicoDArT loci  
107 was 0.99. The high call ratio and reproducibility of the sequenced loci indicate the good  
108 quality of these markers for further analysis.

### 109 **Genetic diversity and population genetic structure**

110 Sex chromosomes or the mode of sex determination can vary down to population level in  
111 frogs. Prior to performing the sex-linked marker analyses to understand sex-determination in  
112 *P. ornatum*, we performed population genetic analyses to infer whether all 44 individuals  
113 used in this study belong to a single species. We used 4,691 autosomal SNP loci (excluding  
114 all sex-linked loci) with 0% null allele and 100% reproducibility for the population genetic  
115 analyses. The STRUCTURE and Principal Component Analyses (PCA) indicated a distinct  
116 clustering of two genetic groups where 36 individuals (Cluster-1) were genetically distinct  
117 from the other eight (8) individuals (Cluster-2) (Fig 1C, E). The pairwise  $F_{st}$  value between

118 the two clusters was 0.24. The Nei (1972) genetic distance between the two clusters was 0.13  
119 while the mean genetic distance among individuals in Cluster-1 was 0.19 and that in Cluster-  
120 2 was 0.07.

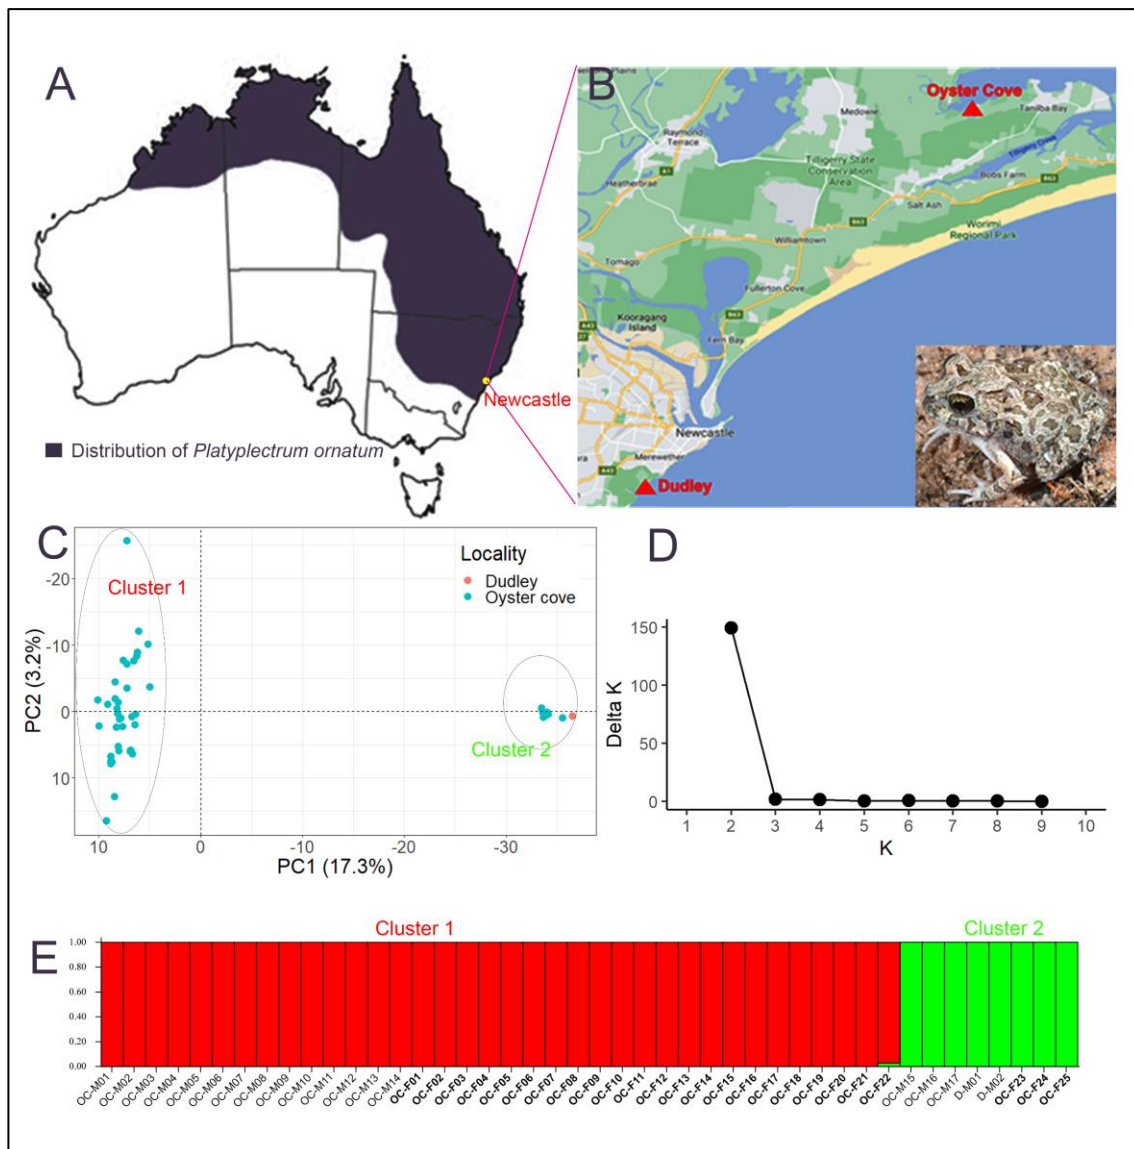

121

122 **Figure 1: Population genetic analyses of *Platyplectrum ornatum*. A – Distribution range**  
123 **of the species. B – Sampling location of the individuals used in this study (in the inset, a**  
124 **photograph of one specimen). C – Principal Component Analysis (PCA) plot using only**  
125 **autosomal markers suggesting two distinct genetic groups within the samples. D –**  
126 **Delta K values from the structure analysis. E – Structure plot separating two clusters**



127 **within the samples. OC-M = Oyster Cove Male, OC-F = Oyster Cove Female, D-M =**  
128 **Dudley Male.**

129 The Analysis of Molecular Variance (AMOVA) indicated that around 23.47% variation was  
130 described by the molecular comparison between the two clusters. The significance test of the  
131 molecular variance indicated significant molecular genetic variation between the two clusters  
132 (Table 1). This suggests that the specimens collected from Oyster cove and Dudley include a  
133 cryptic new species that inhabits sympatrically in Oyster cove. Thus, although this finding is  
134 very important for understanding speciation in Australian native frogs, we separated the two  
135 clusters and analysed those data separately to identify sex-linked markers.

136 **Table 1: Analysis of Molecular Variance (AMOVA) among samples used in this study.**  
137 **df: degrees of freedom. \*: significant**

|                                    | df | Sum.Sq    | Mean.S<br>q  | Sigma   | Molecular<br>variance<br>(%) | Pvalue           |
|------------------------------------|----|-----------|--------------|---------|------------------------------|------------------|
| Between Clusters                   | 1  | 11557.79  | 11557.7<br>9 | 390.84  | 23.47*                       | 2e <sup>-5</sup> |
| Between samples Within<br>Clusters | 42 | 55642.07  | 1324.81      | 50.56   | 3.04                         | 0.11             |
| Within samples                     | 44 | 53842.00  | 1223.68      | 1223.68 | 73.49*                       | 1e <sup>-6</sup> |
| Total                              | 87 | 121041.86 | 1391.29      | 1665.09 | 100.00                       |                  |

138

139 **Sex-linked markers in *P. ornatum***

140 To infer the mode of sex determination, we tested all SNPs and PA loci for both male  
141 heterogametic (XX/XY) and female heterogametic (ZZ/ZW) sex determination systems  
142 criteria (see methods). In Cluster-1, the filtering of loci for sex linkage resulted in 11 SNPs  
143 and 24 PA loci (Table S1), all of which showed association for a male heterogametic sex  
144 determining system (XX/XY) in this cluster of *P. ornatum*. The false-positive test revealed  
145 all 35 markers as true sex-linked loci. Out of the 11 sex-linked SNP loci, we found one  
146 perfectly sex-linked in all individuals: all females are homozygous, suggesting XX biallelic  
147 form of the locus, while all males are heterozygous, suggesting an XY biallelic form for the  
148 locus. We found ten SNP loci that are moderately sex-linked, showing heterozygous (XY)  
149 allelic form in a few females, while homozygous (XX) allelic form in some males. However,  
150 none of the ten loci were discordant in more than 20% of individuals (as per the filtering  
151 criteria). Similarly, in PA loci, we found six perfectly sex-linked PA loci that are concordant  
152 (i.e., present in all males and absent in all females) in all 36 individuals (100%). We found  
153 slight discordance (<20%) in the rest of the 18 PA loci, showing the presence of these loci in  
154 a few females while absent in a few males (Table S1).

155 Given the number of individuals from each sex group (five males and three females) in  
156 cluster-2 was comparatively low, we identified markers that were 100% concordant to each  
157 sex as sex-linked. We found 38 SNPs and 51 PA loci that support a male heterogametic sex  
158 determination (XX/XY) system within this cluster (Figure 2). For instance, all SNPs were  
159 heterozygous in males and homozygous in females while all PA loci were present in males  
160 and absent in females (Table S2). In contrast, we found 54 SNPs and 67 PA loci that supports  
161 the female heterogametic sex-determination system (ZZ/ZW) (Figure 2): all the SNP loci  
162 were heterozygous and all the PA loci were present in females while they were all  
163 homozygous or absent in males (Table S2).

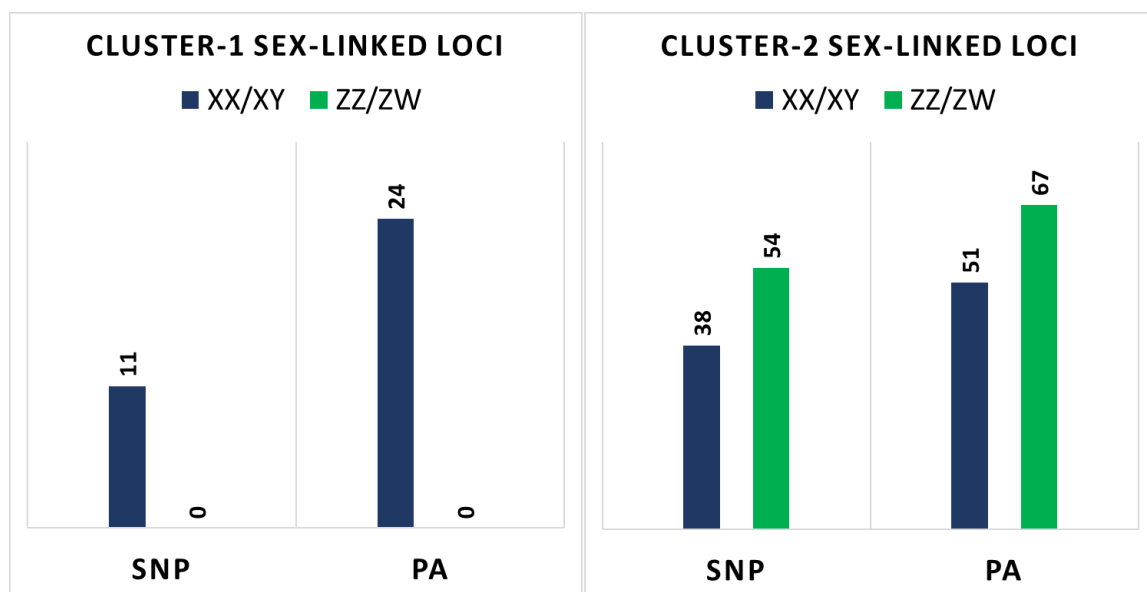

164

165 **Figure 2: Number of sex-linked Single Nucleotide Polymorphism (SNP) and Presence-**  
166 **Absence (PA) loci in two clusters of *Platyplectrum ornatum*. XX/XY denotes markers**

167 **supporting a male heterogametic sex determination system. ZZ/ZW denotes markers**  
168 **that support a female heterogametic sex determination system.**

169 The pairwise Hamming distance matrix analysis using sex-linked SNPs and PA loci (Figure  
170 3A-D) showed high differentiation between males and females in both clusters, suggesting a  
171 strong association of these markers to the putative sex chromosomes (Figure 3A-D). In  
172 cluster-1, the mean pairwise distance among males was 0.15 for the SNP loci and 0.11 for the  
173 PA loci. Among the female individuals of cluster-1, the mean pairwise distance was 0.05 for  
174 the SNP loci and 0.10 for the PA loci. The overall genetic distance between the two sexes  
175 was 0.97 for the SNP loci and 0.92 for the PA loci. Cochran–Armitage test verifies the  
176 significant association of all 11 SNP loci ( $\chi^2 = 0.97$ ,  $p = 0.04$ ) and 24 PA loci ( $\chi^2 = 0.99$ ,  $p$   
177  $= 0.02$ ) with phenotypic sex in cluster 1. In cluster 2, the mean pairwise distance among males  
178 was 0 for SNP loci and 0 for PA loci while the mean pairwise distance among females was 0  
179 for SNP loci and 0 for PA loci. The overall genetic distance between the two sexes was 1 for  
180 the SNP loci and 1 for the PA loci. Cochran–Armitage test verifies the significant association  
181 of all 92 SNP loci ( $\chi^2 = 1$ ,  $p = 0$ ) and 118 PA loci ( $\chi^2 = 1$ ,  $p = 0$ ) with phenotypic sex in  
182 cluster-2.

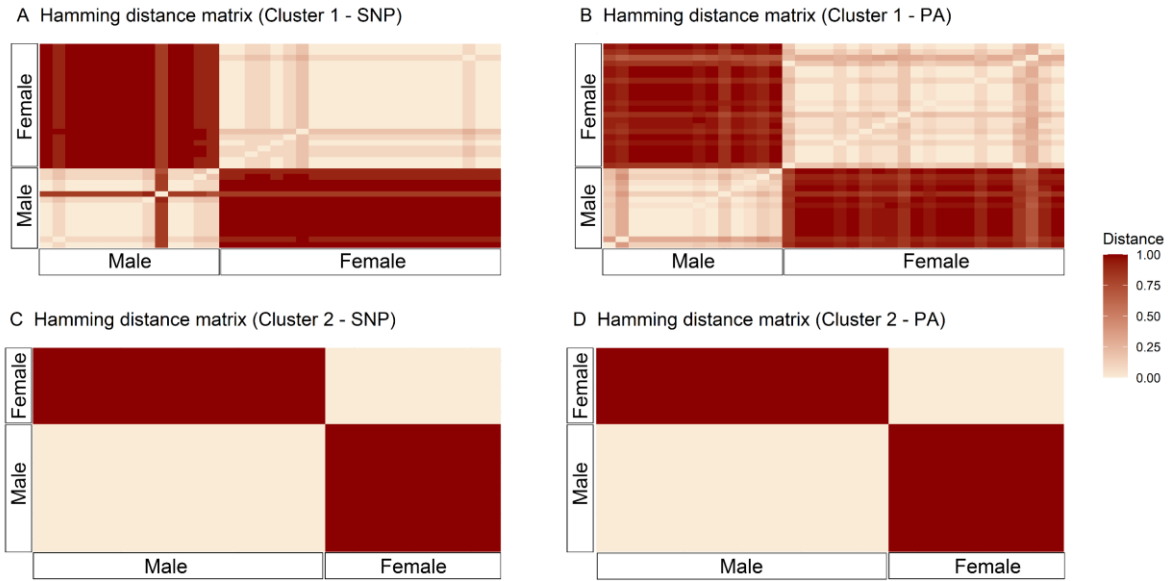

183

184 **Figure 3: Hamming distance matrix using sex-linked SNP and PA loci in two clusters of**  
185 ***Platyplectrum ornatum*. A – genetic distance using SNP loci among individuals of cluster**  
186 **1. B – genetic distance using PA loci among individuals of cluster 1. C – genetic distance**  
187 **using SNP loci among individuals of cluster 2. D – genetic distance using PA loci among**  
188 **individuals of cluster 2.**

189

190 **Alignment of sex-linked markers against *P. ornatum* genome and BLAST search of the**  
191 ***P. ornatum* sex-linked scaffolds against *Rana temporaria* genome**

192 We identified 29 sex-linked scaffolds in cluster-1 (Table S3) and 168 sex-linked scaffolds in

193 cluster 2 (Table S4). The BLAST search of the sex-linked scaffolds against the *Rana*

194 *temporaria* genome identified 7 genes in cluster-1 (Table S5) and 51 genes in cluster-2

195 (Table S6). Out of seven genes of the cluster-1, five genes (*PHLDA2*, *KCNC1*, *TBC1D17*,

196 *Sacsin-like*, *PRMT1*) are located in chromosome (Chr) 10, one gene (*HS3ST6*) on Chr 6, and

197 one gene (*MIPOL1*) on Chr 13 of *R. temporaria*. In cluster-2, we found a total of 7, 2, 6, 4, 5,

198 1, 3, 3, 12, 4, 1 and 1 gene harboured on Chr 1, Chr 2, Chr 3, Chr 5, Chr 6, Chr 7, Chr 8, Chr

199 9, Chr 10, Chr 11, Chr 12 and Chr 13 respectively (Table S6). Our analysis indicated that out  
200 of 51 genes, 23 genes were homologous to *P. ornatum* scaffolds that support a male  
201 heterogametic sex determination while 29 genes to that support a female heterogametic sex  
202 determination.

203 Findings from the BLAST search clearly indicate that the sex chromosome of *P. ornatum* is  
204 homologous to chromosome 10 of *R. temporaria*. Then, we further BLAST searched the sex-  
205 linked genes against the genome of *Xenopus tropicalis*. Our analysis found the 16 genes to be  
206 located on chromosome 7 of *X. tropicalis*. A comparative analysis between *R. temporaria*  
207 and *X. tropicalis* indicates that out of the 16 genes on chromosome 7 of *X. tropicalis*, 14 are  
208 located on chromosome 10 of *R. temporaria* while the other two are on chromosome 8 (Table  
209 S7).

## 210 **Cytogenetic screening of putative sex chromosomes in *Platyplectrum ornatum***

### 211 **Karyotyping and C-banding**

212 The karyotype analysis revealed  $2n = 22$  as described previously (Lamichhaney et al., 2021).  
213 Out of 11 homologous chromosome pairs, we found no heteromorphic sex chromosomes  
214 (Figure 4a-b) indicating *P. ornatum* has a homomorphic X and Y chromosome system

215 (Figure 4a-b). Our C-banding analysis identified a comparatively higher accumulation of  
216 heterochromatin in the centromeric regions of all chromosomes along with a faint  
217 heterochromatin on either or both arms of chromosomes 1, 2, 3, 4, 5, and 6. We did not detect  
218 any sex specific C-banding pattern (Figure 4c-d).

### 219 **Comparative Genome Hybridisation (CGH)**

220 Our CGH analysis did not identify any sex specific pattern in *P. ornatum* (Figure 4e-f). We  
221 observed genome wide hybridisation pattern of fluorescently labelled DNA on both male and  
222 female chromosomes, indicating cytologically indistinguishable genomic differentiation  
223 between the X and Y chromosomes.

### 224 **Fluorescence *in situ* Hybridisation (FISH) of Telomeric sequence**

225 The FISH analysis indicates hybridisation of telomeric sequences only in the terminal region  
226 of each chromosome, but no sex specific interstitial telomere sequences (ITS) in *P. ornatum*  
227 (Figure 4g-h).

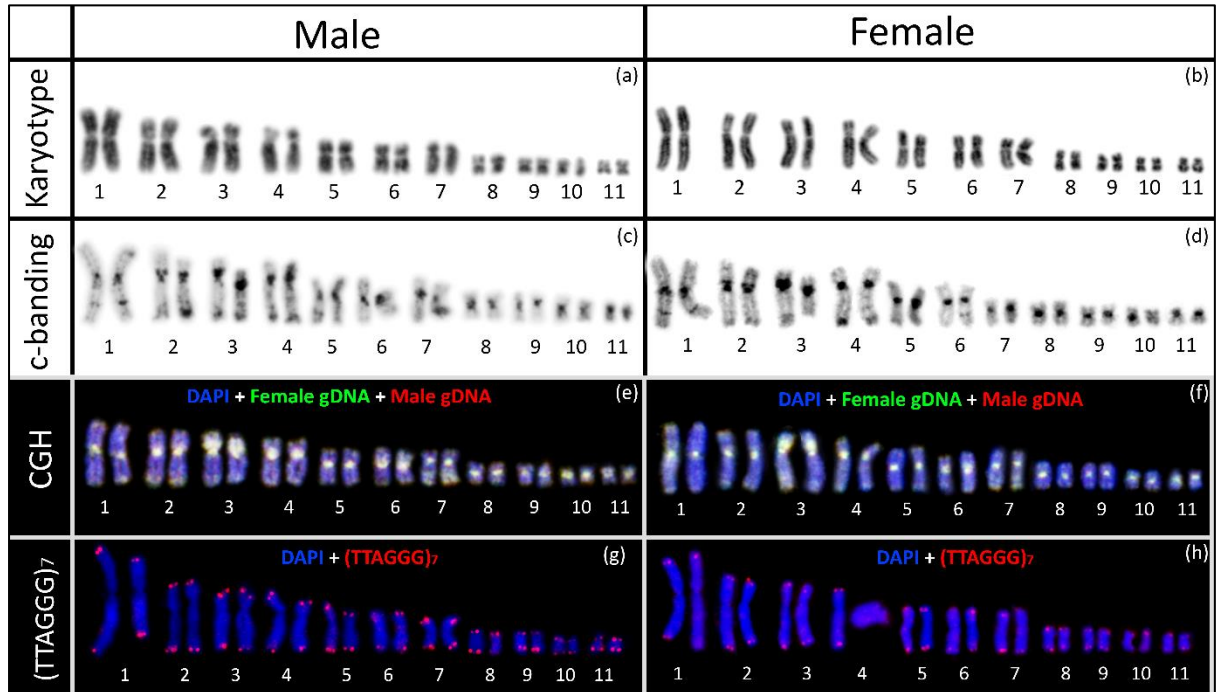

229 **Figure 4: Cytogenetic screening of putative X and Y chromosomes in *Platyplectrum***  
230 ***ornatum*. a) DAPI stained karyotype of male. b) DAPI stained karyotype of female. c)**  
231 **DAPI stained c-banding karyotype of male. d) DAPI stained c-banding karyotype of**  
232 **female. e) Comparative Genome Hybridisation (CGH) in male. f) Comparative Genome**  
233 **Hybridisation (CGH) in female. g) Fluorescence *in situ* Hybridisation (FISH) with**  
234 **telomere specific probes in male. h) Fluorescence *in situ* Hybridisation (FISH) with**  
235 **telomere specific probes in female.**

236

## 237 DISCUSSION

### 238 A new cryptic species of *P. ornatum*?

239 In this study, our aim was to identify the sex chromosomes and heterogametic sex in the  
240 Australian frog *P. ornatum*. Unexpectedly, however, we identified two genetically distinct  
241 clusters within the species based on SNPs. The  $F_{st}$  between the two is 0.24 and genetic



242 distance (Nei) is 0.13, which are not high as a specific level, but PCA clearly indicates that  
243 they are genetically separated from each other and suggests establishment of reproductive  
244 isolation, probably, of pre-mating between the two, because they sympatrically inhabit the  
245 same region in Oyster cove. This finding provides an unexpected, well-suited model to study  
246 the early stage of sex chromosome evolution by comparison between the genetically closest  
247 two lineages and also contributes to understanding the mechanisms of speciation in  
248 Australian frogs.

249 **Homomorphic sex chromosomes and male or female sex determining mechanism in *P.***  
250 ***ornatum***

251 As a new, cryptic species could be present in the two populations of *P. ornatum* studied here,  
252 we separated the two clusters-1 and -2 to individually isolate the sex-linked markers. From  
253 cluster-1, 35 sex-linked markers were isolated and were heterozygous in males (and  
254 homozygous in females), which are highly conserved markers across male individuals,  
255 suggesting that cluster-1 has male heterogametic sex determination. In contrast, cluster-2 had  
256 210 isolated sex-linked markers, of which 89 were heterozygous or present in males (defined  
257 as male specific), while the other 121 were female heterozygous or present in females  
258 (female specific). The almost equal number of male and female specific markers indicates

259 that cluster-2 has a homomorphic sex chromosome in both sexes with free recombination  
260 between the pair, and the heterogametic sex in cluster-2 remains to be solved. Through  
261 cytogenetic analyses of C-banding, CGH and telomere FISH, we demonstrated in cluster-1 of  
262 *P. ornatum* does not have any heteromorphic sex chromosomes and therefore, like many  
263 frogs, the two clusters of this species have homomorphic sex chromosomes with very little  
264 genomic differences between their sex chromosome pairs. This chromosome observation  
265 strongly supports the free recombination between the sex chromosomes: many moderately  
266 sex-linked markers in cluster-1 and equal numbers of male and female sex-specific markers  
267 in cluster-2.

268 The difference in number of sex-linked markers isolated between the two clusters may be due  
269 to either or both of the following two reasons. First, it is the depth of genetic variations across  
270 the individuals used for the analysis. The genetic distance within cluster-1 is 0.19 while it is  
271 0.07 within cluster-2, suggesting much higher genetic homogeneity in cluster-2 even though  
272 they are collected from two distant locations. This homogeneity among the frogs may have  
273 made it easier to isolate many more sex-linked markers in cluster-2, similar to analysis using  
274 offspring of one-sibships. Second, the depth of genomic differentiation between the sex  
275 chromosome pair. In cluster-1, the genomic differences between the X and Y chromosome

276 are at advanced stages of differentiation compared to that of cluster-2 X and Y and thus Y-  
277 linked markers are fixed. On the other hand, the recombination may more freely occur in the  
278 sex chromosome pair in cluster-2 except the sex-determining gene or region tightly linked to  
279 the sex determining locus.

280 **The sex chromosomes of *P. ornatum* are homologous to autosomal chromosome 10 of**  
281 ***Rana temporaria* and ZWY sex chromosome 7 of *Xenopus tropicalis***

282 Using the recently published *P. ornatum* genome (Lamichhaney et al., 2021), we assigned 219  
283 out of 245 sex-linked markers to *P. ornatum* scaffolds (Table S3 and Table S4). Compared to  
284 the DArTseq loci, these scaffolds are larger in size (bp) and allowed us to identify sex  
285 chromosome homologies across multiple frog species with chromosome level assembly. We  
286 identified 7 genes from cluster-1 and 51 genes from cluster-2 that are included in the sex-linked  
287 scaffolds. The comparative analysis across two frog species with well annotated chromosome  
288 level genome assembly indicates that the 14 genes mentioned above are located in chromosome  
289 10 of *Rana temporaria* and those plus two more genes are in the sex chromosome of *Xenopus*  
290 *tropicalis* (Chromosome 7) (Fig 5). The sex chromosome 7 of *X. tropicalis* is partially  
291 homologous to the ZZ-ZW type of sex chromosome 7 in the Japanese bell ring frog *Buergeria*  
292 *buergeri* (Uno et al., 2015). The two chromosomes share two genes, *Cyp17* and *Got1*, which  
293 are also mapped on chromosome 9 of the Japanese soil-frog *Glandirana rugosa* (Sakurai et al.,

294 2008; Suda, Uno, Mori, Matsuda, & Nakamura, 2011), and one of which (*Cyp17*) is on  
295 chromosome 8 of *Rana temporaria*. In addition, the late replication banding patterns are highly  
296 conserved in the chromosomes 9 as well as the other chromosomes with no apparent  
297 chromosomal rearrangements between the latter two species (Miura, 1995). Therefore, these  
298 four chromosomes of four species are partially or wholly homologous to each other. In contrast,  
299 the 14 genes identified in the sex chromosomes of *P. ornatum* are located on chromosome 10  
300 of *R. temporaria*, but not on chromosome 8 that is homologous to a part of chromosome 7 of  
301 *X. tropicalis* (Fig. 5). This could be explained by the chromosomal arrangements that  
302 specifically occurred in *X. tropicalis*, of which chromosome 7 was derived from a fusion of  
303 two chromosomes, one of which is homologous to chromosome 8 and the other to chromosome  
304 10 of *Rana temporaria* (Fig.5). Of particular interest is that the sex determining region of *X.*  
305 *tropicalis* is estimated to be located within 10.4 Mb from the terminal tip of the sex  
306 chromosome (Furman et al., 2020). The two genes of *Cyp17* and *Got1*, which are located within  
307 the non-recombining region in sex chromosome 7 of *B. buergerii*, are located next to the sex  
308 determining region on Z, W and Y chromosomes. The two sex-linked genes, *GAPDH like* and  
309 *DPYSL4* of *P. ornatum*, are located at or around the sex determining region of chromosome 7  
310 of *X. tropicalis* (Fig. 5). Thus, it is likely that the sex determining gene of *P. ornatum* is shared

311 with the sex determining gene(s) of *X. tropicalis* and *B. buergerii*. Probably, cluster-1 of *P.*  
 312 *ornatum* has male heterogametic sex determination, whereas we have not enough data to decide  
 313 the heterogametic sex in cluster-2. Interestingly, chromosome 7 of *X. tropicalis* can work as a  
 314 W chromosome to determine femaleness or Y chromosome to determine maleness (Furman et  
 315 al., 2020; Roco et al., 2015). Therefore, the sex-determining locus in the sex chromosome of  
 316 cluster-2 of *P. ornatum* has a potential to dominantly determine male and/or female.

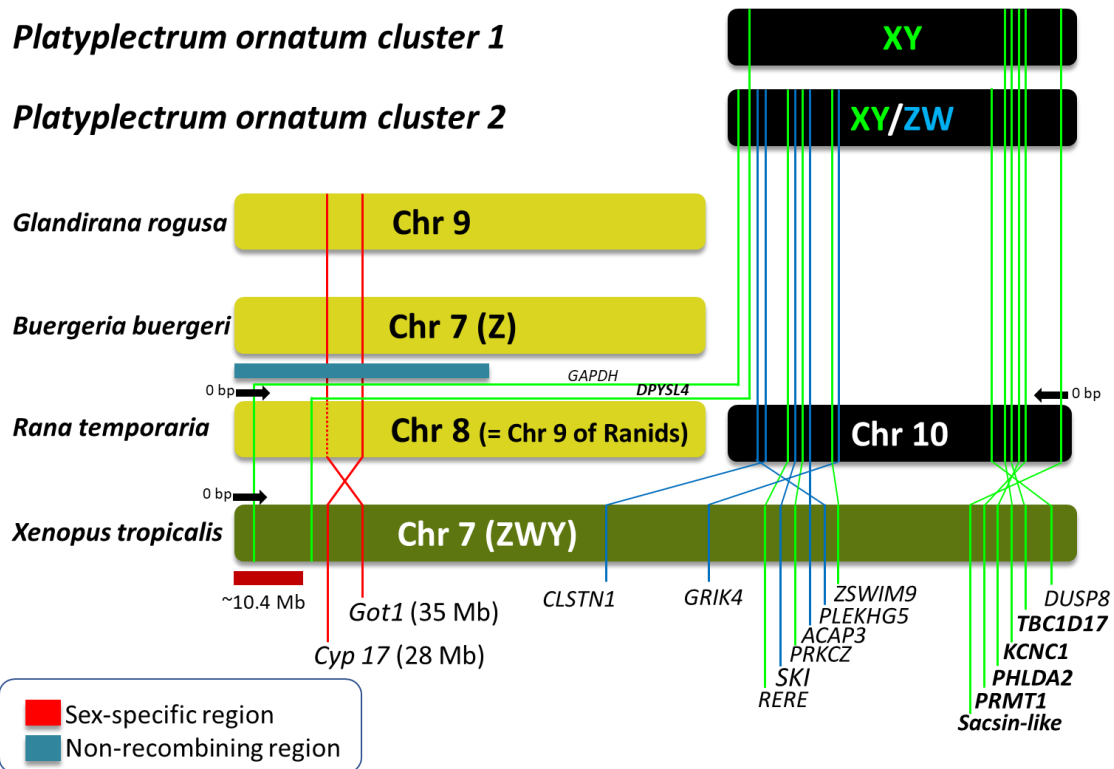

317

318 **Figure 5. Diagram showing sex chromosome homology of *P. ornatum* with chromosomes**  
 319 **of other frog species. The sex determining region (10.4 Mb) of *X. tropicalis* is estimated to**  
 320 **lie at the terminal tip of sex chromosome 7 (Furman et al. 2020), indicated by a red bar,**  
 321 **and two genes (*Cyp17* and *Got1*) are located next to it. Likewise, chromosome 8, 9 and**  
 322 **ZW sex chromosome 7 of *Glandirana rugosa*, *Rana temporaria* and *Buergeria buergeri*,**  
 323 **respectively, share the two or one genes, and are located within the non-recombining**

324 **region in *B. buergeri* , indicated by a dark blue bar. The six and 14 sex-linked genes**  
325 **identified in cluster-1 and -2 of *P. ornatum*, respectively, are shared with chromosome 10**  
326 **(two with chromosome 8) of *Rana temporaria* or sex chromosome 7 of *X. tropicalis*.**

327

## 328 **Sex chromosome evolution in Australian frogs**

329 In Australia, out of 248 native frog species described, 133 species have had their karyotypes  
330 examined to date (King, 1980, 1990). Surprisingly, a heteromorphic sex chromosome pair has  
331 been identified in just one species, *Crinia bilingua* (Mahony, 1991); the smallest chromosome  
332 pair out of 12 haploid complements is a ZZ-ZW type of heteromorphic sex chromosomes.  
333 Focussing on the genetic, ecological and geographic characteristics of this species and  
334 comparing it to other Australian frog lineages might better help us to understand what drives  
335 the evolution of sex chromosomes from homomorphy to heteromorphy. One of the most  
336 intriguing questions that remains is how often the sex chromosome turnover has been repeated  
337 (or, inversely have not), during the phylogenetic history among Australian native frog lineages,  
338 which explosively and rapidly adapted to Australia's unique climate and habitats and conserved  
339 almost completely homomorphic sex chromosomes. Thus, future studies using such DArT  
340 molecular techniques as we have outlined here are expected to find new and unique cases in

341 sex chromosome evolution and will contribute to understanding the mechanisms underpinning  
342 this.

## 343 **MATERIALS AND METHODS**

### 344 **Ethics statement**

345 All collection and animal handling were performed following the approved animal ethics by  
346 NSW scientific permit SL101269, Macquarie University animal ethics approval 2019-010 and  
347 University of Canberra animal ethics committee (AEC 14-09 and AEC 18-01). Tissues from  
348 all 44 individuals were stored at -20°C until further processing.

### 349 **Animals and phenotypic sexing**

350 We used 44 phenotypically sexed individuals of *Platyplectrum ornatum* for genotyping by  
351 sequencing (GBS). Nineteen (19) phenotypic males and 25 phenotypic females were collected  
352 between January 2016 to October 2018 from two sites: Oyster Cove and Dudley, NSW,  
353 Australia (Figure 1). Phenotypic sex was determined in the field by a combination of the  
354 presence or absence of male nuptial pads, presence or absence of an enlarged flange on the  
355 second digit of the hand used by females to beat egg masses into a frothy mass and by throat

356 colouration (Clulow & Swan, 2018). We further confirmed phenotypic sex in the lab by  
357 dissection and inspection of the gonads post-euthanasia.

### 358 **Genotyping by sequencing using Diversity Arrays Technology Sequencing (DArTseq)**

359 Approximately 25 mm of muscle tissue was collected from each individual and submitted to  
360 Diversity Arrays Technology (DArT) Pty Ltd (University of Canberra, Bruce, ACT, Australia)  
361 for genotyping by sequencing (Kilian et al., 2012). The genomic DNA was extracted by  
362 DArTseq™ following proprietary manufacturer's instruction. Genomic DNA quality was  
363 confirmed by running a 1.2% agarose gel electrophoresis. DArTseq™ uses a combination of  
364 complexity reduction methods and next-generation sequencing (NGS) to generate thousands  
365 of Single Nucleotide Polymorphisms (SNP) and SilcoDArT (presence-absence) loci.  
366 Approximately, 100 ng of DNA from each sample was digested using *PstI* and *SphI* restriction  
367 enzyme. Digested DNA were subjected to a ligation reaction using a *PstI* compatible adaptor  
368 (consisting of an Illumina flow cell attachment sequence, sequencing primer sequence and a  
369 unique barcode sequence) and a *SphI* compatible adaptor (consisting of an Illumina flow-cell  
370 attachment region). The ligated fragments then underwent 30 rounds of PCR (94°C for  
371 20 seconds, 58°C for 30 seconds and 74°C for 45 seconds), followed by an extension of seven  
372 minutes at 72°C. Following PCR, equimolar amounts of amplification products derived from



373 each individual were bulked and applied to Illumina’s proprietary cBlot bridge PCR, which  
374 was followed by sequencing on an Illumina Hiseq2000. The single read sequencing was run  
375 for 77 cycles.

376           The raw sequences generated by Illumina Hiseq2000 were further filtered based on  
377 reproducibility average values, the read depth of each sequence, Polymorphism Information  
378 Content (PIC) and call ratio of each sequence across all individuals. The final SNP and PA data  
379 were then converted into a csv file containing 18 loci matrices including AlleleID, CloneID,  
380 AlleleSequence, TrimmedSequence (sequence after removing adapters), SNP (the  
381 polymorphic nucleotide)SnpPosition, CallRate (proportion of individual for called for a  
382 particular locus), OneRatioRef (presence of the reference allele), OneRatioSnp (presence of  
383 alternate allele), FreqHomRef (proportion of individuals with homozygous to reference allele),  
384 FreqHomSnp (proportion of individuals with homozygous to SNP allele), FreqHets (proportion  
385 of individuals with presence of both alleles), PICRef (polymorphic information content of the  
386 reference allele), PICSnp (polymorphic information content of the alternate allele), AvgPIC  
387 (average PIC), AvgCountRef (average count of the reference allele), AvgCountSnp (average  
388 count of the alternate allele) and RepAvg (reproducibility average of the locus). Each locus  
389 presented as “0” alternatively known as “homozygous reference”, “1” alternatively known as

390 “homozygous SNP” and “2” alternatively known as “heterozygous”. If an allele failed to call  
391 successfully for an individual due to sequencing error or low-quality genomic DNA, the locus  
392 was presented as a null allele or “-”. For PA markers, the presence of a marker was presented  
393 as “1” and the absence of the marker in the genomic representation was referred as “0”. Similar  
394 to the SNP loci, null alleles for PA markers were also presented as “-”.

### 395 **Population genetic structure analysis**

396 We performed population genetic structure analysis to identify genetic variation among all 44  
397 individuals analysed in this study. We filtered out all sex-linked loci and loci that were not with  
398 100% call ratio and 100% reproducibility average for this analysis. The filtering of loci was  
399 performed using “dartR” version 1.9.4 package in R (Gruber, Unmack, Berry, & Georges,  
400 2018). The Principal Component Analysis (PCA) was performed using “dartR” version 1.9.4  
401 package in R (Gruber et al., 2018). The genetic structure analysis was performed with an  $F_{st}$   
402 based structure analysis software “Structure” version 2.3.4. We performed an admixture model  
403 with 1000 burn in and 1000 MCMC assuming 10 populations. Each iteration was run 10 times  
404 to identify appropriate K value among the data set. The deltaK was calculated using “Structure  
405 Harvester” (Earl, 2012).

406 **Identification of sex-linked markers**

407 We combined previously published pipelines to identify both single nucleotide polymorphism  
408 (SNPs) and presence-absence (PA) sex-linked loci in this study (Hill, Burridge, Ezaz, &  
409 Wapstra, 2018; Jeffries et al., 2018; Lambert, Skelly, & Ezaz, 2016; Nguyen et al., 2021;  
410 Sopianowski et al., 2019). First, we filtered out all loci (both SNPs and PA) that were below  
411 80% call ratio. The remaining loci were tested for the presence of both male heterogametic  
412 (XX/XY) and female heterogametic (ZZ/ZW) sex determination systems. For SNPs, a marker  
413 was identified as sex-linked if it was at least 80% heterozygous in one sex and at least 80%  
414 homozygous in the opposite sex. For PA loci, we applied the same filtering criteria as SNPs  
415 where markers that were present in a minimum of 80% in one sex and absent in minimum of  
416 80% in the opposite sex are considered as sex-linked. However, this pipeline tends to identify  
417 a small number of SNPs that support the filtering criteria but are not true sex-linked loci  
418 particularly if the representative samples from each sex is low, i.e., below 13 individuals per  
419 sex as suggested by Lambert et al. (2016). To filter out such loci, we performed a false positive  
420 test across all identified sex-linked loci by calculating the proportion of homozygous alleles as  
421 described by Jeffries et al. (2018). For example, in a male heterogametic sex determination  
422 system (XX/XY), all true sex-linked loci will show a minimum of 80% homozygosity (either

423 reference or alternate alleles for SNPs) to female or the homogametic sex. Similarly, in a  
424 ZZ/ZW system, all true sex-linked loci will show a minimum of 80% homozygosity (either  
425 reference or alternate) to male or the homogametic sex.

426 We used the “countif” function in Microsoft Excel for identification of sex-linked  
427 markers. For calculating Pairwise genetic distance (Hamming distance matrix) we used the  
428 “rdist” function in the “rdist” package in “R” version 3.6.2 (R Core Team, 2017). The Cochran–  
429 Armitage trend test (CATT) was performed using R package “CATT” version 2.0 (R Core  
430 Team, 2017).

431 **Alignment of sex-linked markers against *P. ornatum* genome and orthology analysis using**  
432 **BLAST search**

433 DArTseq loci are usually a result of random sampling from the genomic representation and  
434 comparatively small sized (69 bp or less). Hence, a priori knowledge about gene association  
435 with individual alleles are unknown (Shams et al., 2019). To identify homologous genes and  
436 sequences, we mapped all sex-linked SNP and PA loci to the recently published *P. ornatum*  
437 genome assembly (Lamichhaney et al., 2021) and used the *P. ornatum* sex-linked scaffolds for  
438 a Basic Local Alignment Search Tool (BLAST) analysis. The mapping of sex-linked SNP and

439 PA loci to the *P. ornatum* genome was performed with a Medium/Fast sensitivity using  
440 “Geneious” version 10.2.6 (Kearse et al., 2012). The homologous scaffolds were subject to  
441 BLAST searches against the well annotated (chromosome level) frog genomes for *Rana*  
442 *temporaria* and *Xenopus tropicalis*. We used NCBI BLASTn tools  
443 (<http://ncbi.nlm.nih.gov/Blast.cgi>) to perform a megablast search with a threshold e-value  $10^{-3}$ .  
444 <sup>3</sup>.

#### 445 **Molecular Cytogenetics analysis to identify sex chromosome pairs**

#### 446 **Metaphase chromosome preparation**

447 To identify putative sex chromosomes in *P. ornatum* we performed molecular cytogenetic  
448 analyses in one male and one female. Metaphase chromosomes were prepared following the  
449 protocol described in (Netto, Pauls, & de Mello Affonso, 2007) with slight modification.  
450 Briefly, bone marrow was extracted and rinsed in a small glass Petri dish with 5 ml chilled  
451 Roswell Park Memorial Institute (RPMI) 1640 (Gibco, chilled at 4°C) culture medium and  
452 then transferred to a centrifuge tube containing 10 ml RPMI. Approximately three drops of  
453 colchicine (0.1% w/v) was then added to the solution and incubated for 45 minutes at room  
454 temperature. The cell suspension was then centrifuged at 1000 RPM for 10 minutes.

455 Supernatant was discarded and 10 ml hypotonic solution (0.075 M KCl) was added, mixed and  
456 incubated the cell suspension for 40 minutes at room temperature. Five drops of chilled freshly  
457 prepared Carnoy's solution (methanol:acetic acid 3:1 at 4°C) was then added to the cell  
458 suspension and was centrifuged at 1000 RPM for 10 minutes. After centrifugation supernatant  
459 was discarded and cells were fixed in freshly prepared Carnoy's solution at room temperature.  
460 Fixed cells were centrifuged three times at 1000 RPM for 10 minutes, discarding the  
461 supernatant after each centrifugation step. After the last centrifugation, supernatant was  
462 discarded and cells pellet was resuspended with Carnoy's solution at a ratio of 1:1 (v/v) and  
463 mixed the solution to achieve a homogeneous cell suspension. Cell suspensions were dropped  
464 onto glass slides and air-dried. For DAPI (40-6-diamidino-2-phenylindole) staining, slides  
465 were mounted with antifade medium Vectashield (Vector Laboratories, Burlingame, CA,  
466 USA) containing 1.5 mg/mL DAPI.

#### 467 **C-Banding**

468 Detection of heterochromatin (C-banding) is a common technique in identifying sex  
469 chromosomes. We performed C-banding on metaphase chromosomes of both the male and  
470 female to identify sex specific heterochromatinisation following the protocol described in Ezaz  
471 et al. (2005) with a slight modification. Briefly, 20–25 µL of cell suspension was dropped on

472 slides, air dried and aged at  $-80^{\circ}\text{C}$  overnight. Slides were then treated with 0.2 M HCl at room  
473 temperature for 20 minutes followed by 5%  $\text{Ba}(\text{OH})_2$  at  $45^{\circ}\text{C}$  for 3 minutes. The slides were  
474 then incubated in  $2\times$  saline sodium citrate (SSC) at  $65^{\circ}\text{C}$  for 60 min. Finally, the chromosomes  
475 were stained with antifade medium Vectashield containing 1.5 mg/mL DAPI.

#### 476 **Comparative Genomic Hybridisation (CGH)**

477 Hybridisation of fluorescently labelled genomic DNA from each sex is one of the most  
478 effective and widely used techniques to identify sex chromosome pairs in a species. We  
479 performed Comparative Genomic Hybridisation (CGH) on both male and female metaphase  
480 following the protocol described by Ezaz et al. (2005). Briefly, female and male total genomic  
481 DNA was labelled by Nick translation (NT), incorporating Spectrum-Green and Spectrum-Red  
482 dUTP, respectively, NT kit (Abbott Molecular, Macquarie Park, Australia). Nick translation  
483 reaction was incubated at  $15^{\circ}\text{C}$  for 2 hours. After the incubation, NT labelled DNA were  
484 checked using 1% agarose gel electrophoresis for size fractionation to 200–500bp. Labelled  
485 DNA were co-precipitated by overnight incubation at  $-20^{\circ}\text{C}$  with 5–10  $\mu\text{g}$  of salmon sperm  
486 DNA, 20  $\mu\text{g}$  glycogen and 3 volumes of chilled 100% ethanol. Precipitation reaction was  
487 centrifuged at maximum speed for 30 min, and the supernatant was discarded and air-dried.  
488 Depending on the size of pellet, the co-precipitated probe DNA was resuspended in 30–40  $\mu\text{L}$

489 hybridisation buffer (50% formamide, 10% dextran sulfate, 2× SSC, 40 mmol/L sodium  
490 phosphate pH 7.0 and 1× Denhardt's solution). The hybridisation and labelled DNA solution  
491 was added to the glass slide containing aged metaphase chromosomes, covered with a cover  
492 slip and sealed with rubber cement. Labelled DNA and metaphase chromosomes were  
493 denatured at 70°C for 5 minutes and incubated at 37°C for 3 days in a humid chamber. Slides  
494 were washed once at 60°C in 0.4× SSC, 0.3% Igepal for 3 minutes, followed by another wash  
495 at room temperature in 2× SSC, 0.1% Igepal for 2 minutes. Slides were then air-dried and  
496 mounted with antifade medium Vectashield containing 1.5 mg/mL DAPI. Images were  
497 captured using a Zeiss Axioplan epifluorescence microscope equipped with a charge-coupled  
498 device (CCD) camera (RT-Spot), (Zeiss, Oberkochen, Germany) using filters 02, 10 and 15  
499 from the Zeiss fluorescence filter set or the Pinkel filter set (Chroma technologies, filter set  
500 8300, Bellows Falls, VT, USA). ISIS scientific imaging software (Metasystems, Altusheim,  
501 Germany) was used for image capture and analysis, including karyotyping. For FISH and CGH  
502 image analysis, multiple functions of ISIS scientific imaging software were used, such as signal  
503 normalizing and background correction. Processed images were pseudocoloured and  
504 superimposed, using ISIS scientific imaging software.

505



506 **Fluorescence *in situ* Hybridisation using telomeric sequences**

507 To identify interstitial telomeric sequences, we performed Fluorescence *in situ* Hybridisation  
508 (FISH) using vertebrate specific telomeric repeats. The ready to use 5'-Cy3-labeled single  
509 strand telomeric probes (TTAGGG)<sub>7</sub> (PNA Bio) were purchased from PNAGENE Inc  
510 (Daejeon, Korea). The FISH was performed following the manufacturer protocol. Briefly, air  
511 dried slides with metaphase chromosomes were dehydrated in a cold ethanol series (70% (v/v),  
512 85% (v/v) and 100% (v/v) ethanol) for 1 minute each. Air dried slides were preheated at 80°C  
513 for 5 minutes. For each slide, 20 µl (150-200 ng) probe and hybridisation buffer mixture was  
514 added and sealed with a cover slip. Chromosomes were then denatured at 85°C for 10 minutes  
515 and incubated in a dark chamber at room temperature for 60 minutes. After 60 minutes, the  
516 cover slips were removed, and the slides were washed in a solution containing 2×SSC and  
517 0.1% (v/v) Tween-20 at 60°C for 10 minutes. This step was performed twice before washing  
518 slides again at room temperature for 1 minute. Slides were then air dried and mounted with  
519 antifade medium Vectashield containing 1.5 mg/mL DAPI.

520 **SUPPLEMENTARY DATA**

521 Supplementary data to this article can be found online.

522 **COMPETING INTERESTS**

523 The authors declare that they have no competing interests.

## 524 **AUTHOR CONTRIBUTIONS**

525 TE conceived the idea. SC performed field work and TE sample collection. CS, FS and ZM

526 conducted lab works. CS, FS, IM and TE performed the analysis. CS, FS, TE and IM wrote

527 the initial draft. All co-authors contributed intellectually to writing and editing the draft

528 multiple times. All authors read and approved the final version of the manuscript.

529

## 530 **ACKNOWLEDGEMENTS**

531 The authors would like to acknowledge Julie Strand for assistance with tissue sub sampling.

## 532 **FUNDING**

533 This work was part of CH's Honours project and funded by University of Canberra strategic

534 research funding awarded to TE.

## 535 **REFERENCES**

536 Bachtrog, D., Mank, J. E., Peichel, C. L., Kirkpatrick, M., Otto, S. P., Ashman, T.-L., . . .

537 Ming, R. (2014). Sex determination: why so many ways of doing it? *PLoS biology*,

538 *12*(7), e1001899.

- 539 Capel, B. (2017). Vertebrate sex determination: evolutionary plasticity of a fundamental  
540 switch. *Nature Reviews Genetics*, *18*(11), 675-689.
- 541 Clulow, S., & Swan, M. (2018). *A complete guide to frogs of Australia*. Sydney Australia:  
542 Australian Geographic.
- 543 Earl, D. A. (2012). STRUCTURE HARVESTER: a website and program for visualizing  
544 STRUCTURE output and implementing the Evanno method. *Conservation genetics*  
545 *resources*, *4*(2), 359-361.
- 546 Ezaz, T., Quinn, A. E., Miura, I., Sarre, S. D., Georges, A., & Graves, J. A. M. (2005). The  
547 dragon lizard *Pogona vitticeps* has ZZ/ZW micro-sex chromosomes. *Chromosome*  
548 *Res*, *13*. doi:10.1007/s10577-005-1010-9
- 549 Ezaz, T., Stiglec, R., Veyrunes, F., & Graves, J. A. M. (2006). Relationships between  
550 vertebrate ZW and XY sex chromosome systems. *Curr Biol*, *16*.  
551 doi:10.1016/j.cub.2006.08.021
- 552 Furman, B. L., Cauret, C. M., Knytl, M., Song, X.-Y., Premachandra, T., Ofori-Boateng, C., .  
553 . . Evans, B. J. (2020). A frog with three sex chromosomes that co-mingle together in  
554 nature: *Xenopus tropicalis* has a degenerate W and a Y that evolved from a Z  
555 chromosome. *PLoS genetics*, *16*(11), e1009121.

- 556 Gruber, B., Unmack, P. J., Berry, O. F., & Georges, A. (2018). dartr: An r package to  
557 facilitate analysis of SNP data generated from reduced representation genome  
558 sequencing. *Molecular ecology resources*, *18*(3), 691-699.
- 559 Hill, P. L., BurrIDGE, C. P., Ezaz, T., & Wapstra, E. (2018). Conservation of sex-linked  
560 markers among conspecific populations of a viviparous skink, *Niveoscincus ocellatus*,  
561 exhibiting genetic and temperature-dependent sex determination. *Genome biology and  
562 evolution*, *10*(4), 1079-1087.
- 563 Jeffries, D. L., Lavanchy, G., Sermier, R., Sredl, M. J., Miura, I., Borzée, A., . . . Dufresnes,  
564 C. (2018). A rapid rate of sex-chromosome turnover and non-random transitions in  
565 true frogs. *Nature communications*, *9*(1), 1-11.
- 566 Kearse, M., Moir, R., Wilson, A., Stones-Havas, S., Cheung, M., Sturrock, S., . . . Duran, C.  
567 (2012). Geneious Basic: an integrated and extendable desktop software platform for  
568 the organization and analysis of sequence data. *Bioinformatics*, *28*(12), 1647-1649.
- 569 Kilian, A., Wenzl, P., Huttner, E., Carling, J., Xia, L., Blois, H., . . . Hopper, C. (2012).  
570 Diversity arrays technology: a generic genome profiling technology on open  
571 platforms. In *Data Production and Analysis in Population Genomics: Methods in  
572 Molecular Biology* (pp. 67-89). Totowa, New Jersey, United States: Humana Press.

- 573 King, M. (1980). C-banding studies on Australian hylid frogs: secondary constriction  
574 structure and the concept of euchromatin transformation. *Chromosoma*, 80(2), 191-  
575 217.
- 576 King, M. (1990). *Amphibia. Animal Cytogenetics 4, Chordata 2*. Gebruder Borntraeger,  
577 Berlin, Stuttgart: Balogh Scientific Books.
- 578 Lambert, M. R., Skelly, D. K., & Ezaz, T. (2016). Sex-linked markers in the North American  
579 green frog (*Rana clamitans*) developed using DArTseq provide early insight into sex  
580 chromosome evolution. *BMC genomics*, 17(1), 844.
- 581 Lamichhaney, S., Catullo, R., Keogh, J. S., Clulow, S., Edwards, S. V., & Ezaz, T. (2021). A  
582 bird-like genome from a frog: Mechanisms of genome size reduction in the ornate  
583 burrowing frog, *Platyplectrum ornatum*. *Proceedings of the National Academy of*  
584 *Sciences*, 118(11).
- 585 Ma, W.-J., & Veltsos, P. (2021). The Diversity and Evolution of Sex Chromosomes in Frogs.  
586 *Genes*, 12(4), 483.
- 587 Mahony, M. (1991). Heteromorphic sex chromosomes in the Australian frog *Crinia bilingua*  
588 (Anura: Myobatrachidae). *Genome*, 34(3), 334-337.

- 589 Miura, I. (1995). The late replication banding patterns of chromosomes are highly conserved  
590 in the genera *Rana*, *Hyla*, and *Bufo* (Amphibia: Anura). *Chromosoma*, 103(8), 567-  
591 574.
- 592 Miura, I. (2007). An evolutionary witness: the frog *Rana rugosa* underwent change of  
593 heterogametic sex from XY male to ZW female. *Sexual Development*, 1(6), 323-331.
- 594 Miura, I. (2017). Sex determination and sex chromosomes in amphibia. *Sexual Development*,  
595 11(5-6), 298-306.
- 596 Miura, I., Shams, F., Lin, S.-M., Cioffi, M. d. B., Liehr, T., Al-Rikabi, A., . . . Ezaz, T.  
597 (2021). Evolution of a Multiple Sex-Chromosome System by Three-Sequential  
598 Translocations among Potential Sex-Chromosomes in the Taiwanese Frog *Odorrana*  
599 *swinhoana*. *Cells*, 10(3), 661.
- 600 Nei, M. (1972). Genetic distance between populations. *The American Naturalist*, 106(949),  
601 283-292.
- 602 Netto, M. R. d. C. B., Pauls, E., & de Mello Affonso, P. R. A. (2007). A standard protocol for  
603 obtaining fish chromosomes under post-mortem conditions. *Micron*, 38(3), 214-217.

- 604 Nguyen, D. H. M., Ponjarat, J., Laopichienpong, N., Kraichak, E., Panthum, T., Singchat, W.,  
605 . . . Peyachoknagul, S. (2021). Genome-wide SNP analysis suggests male  
606 heterogamety in bighead catfish (*Clarias macrocephalus*). *Aquaculture*, 737005.
- 607 Nishioka, M., Hanada, H., Miura, I., & Ryuzaki, M. (1994). Four kinds of sex chromosomes  
608 in *Rana rugosa*. *Sci. Rep. Lab. Amphibian Biol., Hiroshima Univ*, 13, 1-34.
- 609 Nishioka, M., Miura, I., & Saitoh, K. (1993). Sex chromosomes of *Rana rugosa* with special  
610 reference to local differences in sex-determining mechanism. *Scientific report of the*  
611 *Laboratory for Amphibian Biology*(12), 55-81.
- 612 Ogata, M., Hasegawa, Y., Ohtani, H., Mineyama, M., & Miura, I. (2008). The ZZ/ZW sex-  
613 determining mechanism originated twice and independently during evolution of the  
614 frog, *Rana rugosa*. *Heredity*, 100(1), 92-99.
- 615 R Core Team. (2017). R: A Language and Environment for Statistical Computing, v. 3.3. 1;  
616 R Foundation for Statistical Computing, Vienna, Austria, 2016.
- 617 Roco, Á. S., Olmstead, A. W., Degitz, S. J., Amano, T., Zimmerman, L. B., & Bullejos, M.  
618 (2015). Coexistence of Y, W, and Z sex chromosomes in *Xenopus tropicalis*.  
619 *Proceedings of the National Academy of Sciences*, 112(34), E4752-E4761.

- 620 Rodrigues, N., Merilä, J., Patrelle, C., & Perrin, N. (2014). Geographic variation in sex-  
621 chromosome differentiation in the common frog (*Rana temporaria*). *Molecular*  
622 *Ecology*, 23(14), 3409-3418.
- 623 Ruiz-García, A., Roco, Á. S., & Ballejos, M. (2021). Sex differentiation in amphibians: effect  
624 of temperature and its influence on sex reversal. *Sexual Development*, 15(1-3), 157-  
625 167.
- 626 Saidapur, S., Gramapurohit, N., & Shanbhag, B. (2001). Effect of sex steroids on gonadal  
627 differentiation and sex reversal in the frog, *Rana curtipipes*. *General and comparative*  
628 *endocrinology*, 124(1), 115-123.
- 629 Sakurai, N., Maruo, K., Haraguchi, S., Uno, Y., Oshima, Y., Tsutsui, K., . . . Nakamura, M.  
630 (2008). Immunohistochemical detection and biological activities of CYP17 (P450c17)  
631 in the indifferent gonad of the frog *Rana rugosa*. *The Journal of steroid biochemistry*  
632 *and molecular biology*, 112(1-3), 5-12.
- 633 Sarre, S. D., Ezaz, T., & Georges, A. (2011). Transitions between sex-determining systems in  
634 reptiles and amphibians. *Annu Rev Genomics Hum Genet*, 12. doi:10.1146/annurev-  
635 genom-082410-101518



- 636 Shams, F., Dyer, F., Thompson, R., Duncan, R. P., Thiem, J. D., Kilian, A., & Ezaz, T.  
637 (2019). Application of DArT seq derived SNP tags for comparative genome analysis  
638 in fishes; An alternative pipeline using sequence data from a non-traditional model  
639 species, *Macquaria ambigua*. *PLoS One*, 14(12).
- 640 Sopniewski, J., Shams, F., Scheele, B. C., Kefford, B. J., & Ezaz, T. (2019). Identifying sex-  
641 linked markers in *Litoria aurea*: a novel approach to understanding sex chromosome  
642 evolution in an amphibian. *Scientific reports*, 9(1), 1-10.
- 643 Suda, M., Uno, Y., Mori, Y., Matsuda, Y., & Nakamura, M. (2011). Molecular cytogenetic  
644 characterization of telomere-specific repetitive DNA sequences in *Rana rugosa*.  
645 *Journal of Experimental Zoology Part A: Ecological Genetics and Physiology*,  
646 315(4), 222-231.
- 647 Toups, M. A., Rodrigues, N., Perrin, N., & Kirkpatrick, M. (2019). A reciprocal translocation  
648 radically reshapes sex-linked inheritance in the common frog. *Molecular Ecology*,  
649 28(8), 1877-1889.
- 650 Uno, Y., Nishida, C., Takagi, C., Igawa, T., Ueno, N., Sumida, M., & Matsuda, Y. (2015).  
651 Extraordinary diversity in the origins of sex chromosomes in anurans inferred from  
652 comparative gene mapping. *Cytogenetic and Genome Research*, 145(3-4), 218-229.

- 653 Vitt, L. J., & Caldwell, J. P. (2013). *Herpetology: an introductory biology of amphibians and*  
654 *reptiles*. 525 B Street, Suite 1900, San Diego, California 9210-4495, USA:  
655 Burlington: Academic Press.
- 656 Xu, Y., Du, Z., Liu, J., Su, H., Ning, F., Cui, S., . . . Di, S. (2022). Male heterogametic sex  
657 determination in *Rana dybowskii* based on sex-linked molecular markers. *Integrative*  
658 *Zoology*, *17*(1), 105-114.
- 659 Yoshimoto, S., Ikeda, N., Izutsu, Y., Shiba, T., Takamatsu, N., & Ito, M. (2010). Opposite  
660 roles of DMRT1 and its W-linked paralogue, DM-W, in sexual dimorphism of  
661 *Xenopus laevis*: implications of a ZZ/ZW-type sex-determining system. *Development*,  
662 *137*(15), 2519-2526.
- 663 Yoshimoto, S., Okada, E., Umemoto, H., Tamura, K., Uno, Y., Nishida-Umehara, C., . . . Ito,  
664 M. (2008). A W-linked DM-domain gene, DM-W, participates in primary ovary  
665 development in *Xenopus laevis*. *Proceedings of the National Academy of Sciences*,  
666 *105*(7), 2469-2474.
- 667
